# Supplementary material for: First-principles calculation of the optical properties of the YBa2Cu3O7−δ oxygen vacancies model
Source: Royal Society of Chemistry journal article supplement (doi:10.1039/d3ra01921g), 2023-01-01
Supplement: d3ra01921g1.pdf [file d3ra01921g1.pdf]

## Supplementary Materials

### First-principles calculation of the optical properties of the YBa<sub>2</sub>Cu<sub>3</sub>O<sub>7-δ</sub> oxygen vacancy model

Gang Liu <sup>ab</sup>, Yuanhang Shang <sup>bc</sup>, Baonan Jia <sup>c</sup>, Xiaoning Guan <sup>c</sup>, Lihong Han <sup>c</sup>,  
Xinhui Zhang <sup>e</sup>, Haizhi Song<sup>\*e</sup>, Pengfei Lu<sup>\*cf</sup>

*a. Beijing Key Laboratory of Space-Ground Interconnection and Convergence, Beijing University of Posts and Telecommunications, Beijing 100876, China*

*b. School of Electronic Engineering, Beijing University of Posts and Telecommunications, Beijing 100876, China.*

*c. State Key Laboratory of Information Photonics and Optical Communications, Beijing University of Posts and Telecommunications, Beijing 100876, China.*

*d. School of Science, Xi'an University of Architecture and Technology, Xi'an 710055, Shaanxi, China.*

*e. Southwest Institute of Technical Physics, Chengdu 610041, China. Email: hzsong@uestc.edu.cn*

*f. School of Integrated Circuits, Beijing University of Posts and Telecommunications, Beijing 100876, China. Email: photon.bupt@gmail.com*

#### S1. Planar and apical vacancy models

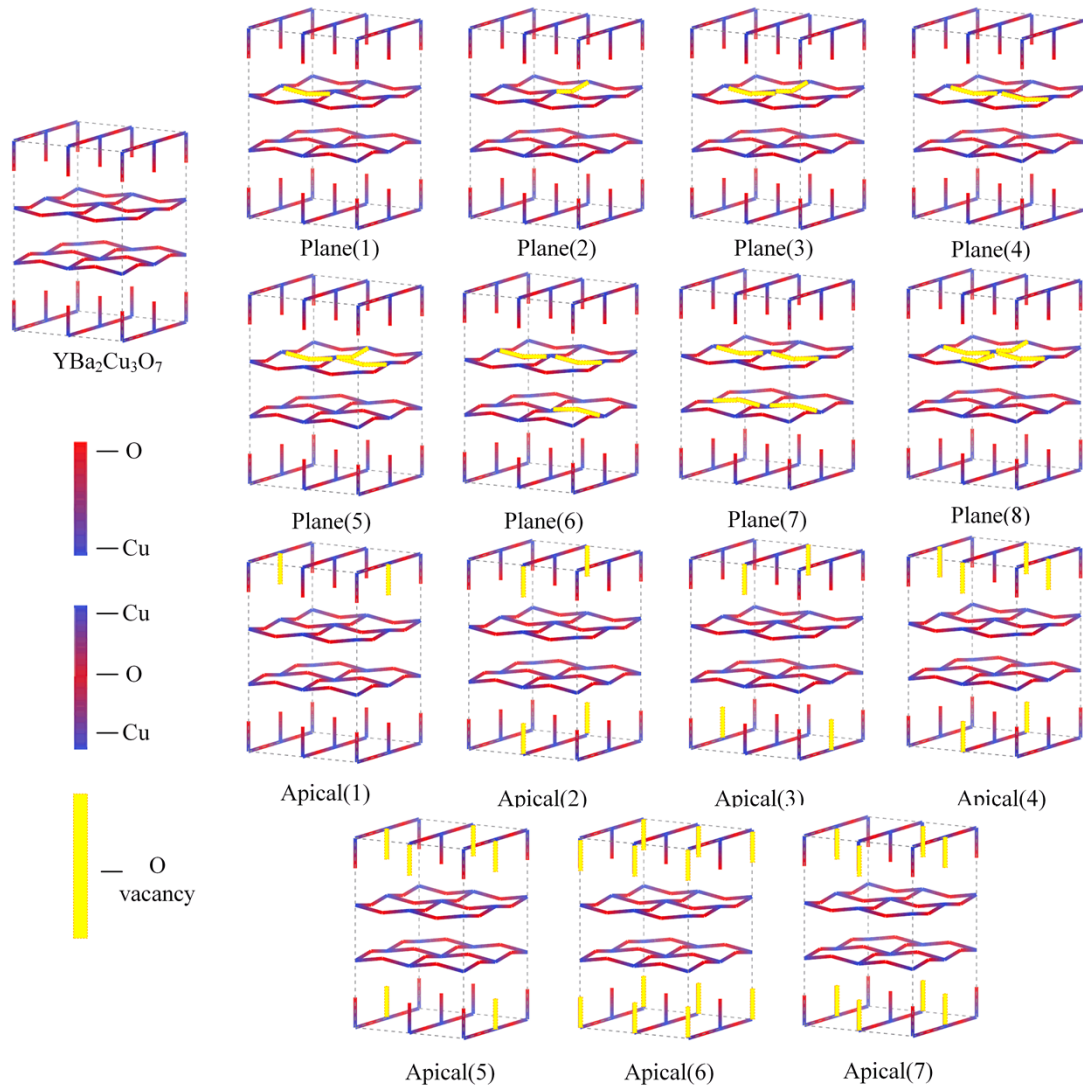

Figure S1 The planar and apical vacancy models of YBa<sub>2</sub>Cu<sub>3</sub>O<sub>7- $\delta$</sub> . The blue bars represent Cu, the red bars represent O, and the blue and red bars represent a Cu-O bond. Yellow bars represent the positions of oxygen vacancies.

## S2. Energy band calculation results for YBCO and its oxygen vacancy model

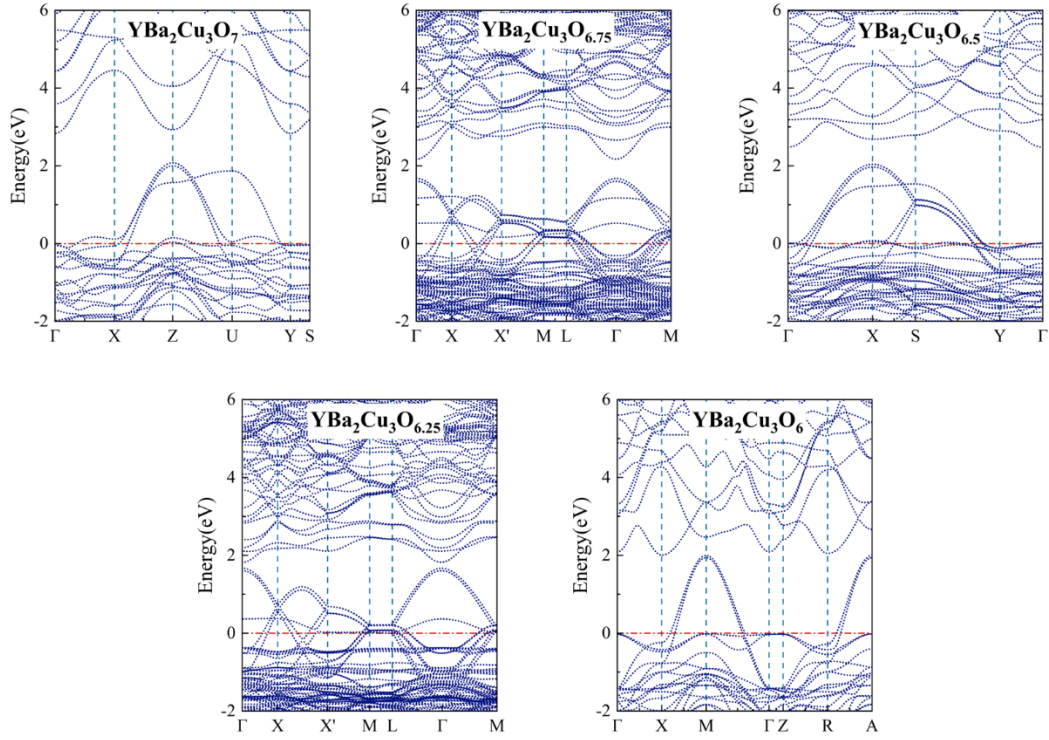

Figure S2 Band structure results of YBCO and its vacancy models. (a)  $\delta=0$   $\text{YBa}_2\text{Cu}_3\text{O}_7$  (b)  $\delta=0.25$   $\text{YBa}_2\text{Cu}_3\text{O}_{6.75}$  (c)  $\delta=0.5$   $\text{YBa}_2\text{Cu}_3\text{O}_{6.5}$  (d)  $\delta=0.75$   $\text{YBa}_2\text{Cu}_3\text{O}_{6.25}$  (e)  $\delta=1$   $\text{YBa}_2\text{Cu}_3\text{O}_6$ .

### S3. The optical absorption spectrum of $\text{YBa}_2\text{Cu}_3\text{O}_{6.25}$ calculated with PBE and PBE+U

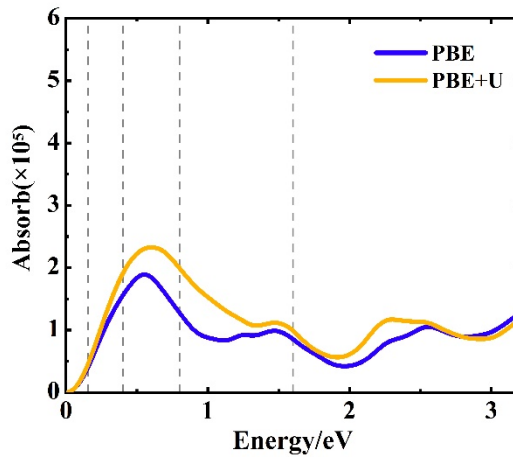

Figure S3 The optical absorption spectrum of  $\text{YBa}_2\text{Cu}_3\text{O}_{6.25}$  in the a-direction calculated with PBE and PBE+U ( $U-J=9\text{eV}$ , applied with the d-orbital of Cu atom). The blue represents the calculation results using the PBE method, and the yellow represents the PBE+U method
